# Supplementary material for: Surface and bulk defect formation during hydrothermal synthesis of LiCoPO4 crystals and their electrochemical implications
Source: Royal Society of Chemistry journal article supplement (doi:10.1039/d3ma00455d), 2023-01-01
Supplement: d3ma00455d1.pdf [file d3ma00455d1.pdf]

## Supplementary Information

# Surface and bulk defect formation during hydrothermal synthesis of LiCoPO<sub>4</sub> crystals and their electrochemical implications

Moohyun Woo,<sup>a</sup> Jinhyuk Lee <sup>a</sup> and George P. Demopoulos <sup>a\*</sup>

<sup>a</sup> *Materials Engineering, McGill University, 3610 rue University, Montréal, QC H3A 0C5, Canada*

\* *Corresponding author: Prof. George P. Demopoulos, email: [george.demopoulos@mcgill.ca](mailto:george.demopoulos@mcgill.ca); ORCID# <https://orcid.org/0000-0001-8112-5339>*

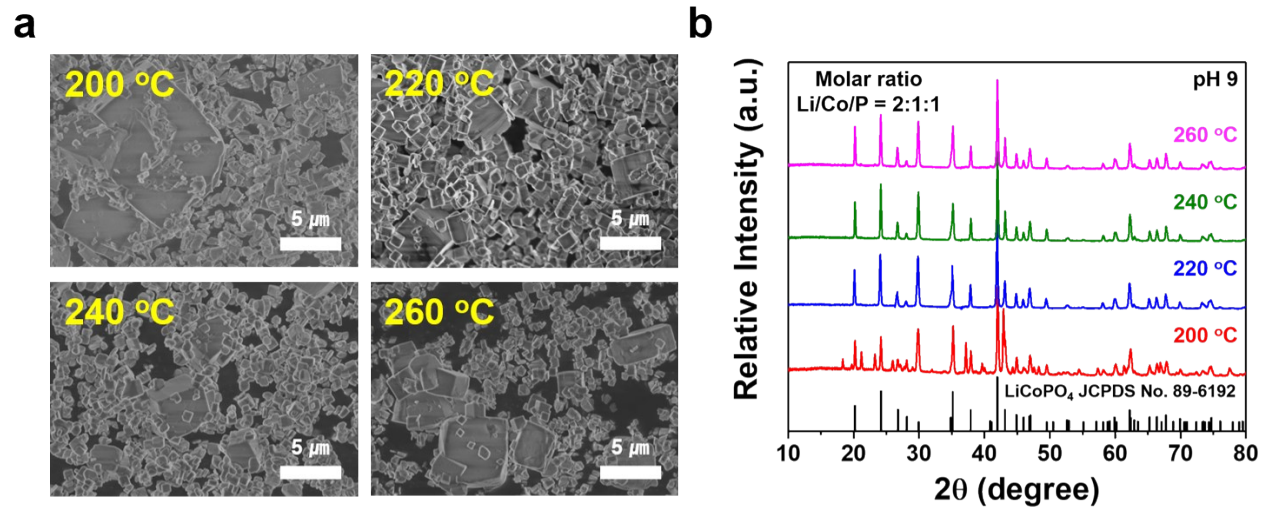

**Figure S1. Morphology and phase characterizations of hydrothermally synthesized LCP (HT-LCP) samples for 6 hours at different temperatures via (a) SEM and (b) XRD. (The concentration of  $\text{CoSO}_4$  and  $\text{H}_3\text{PO}_4$  is fixed at 0.4 M).**

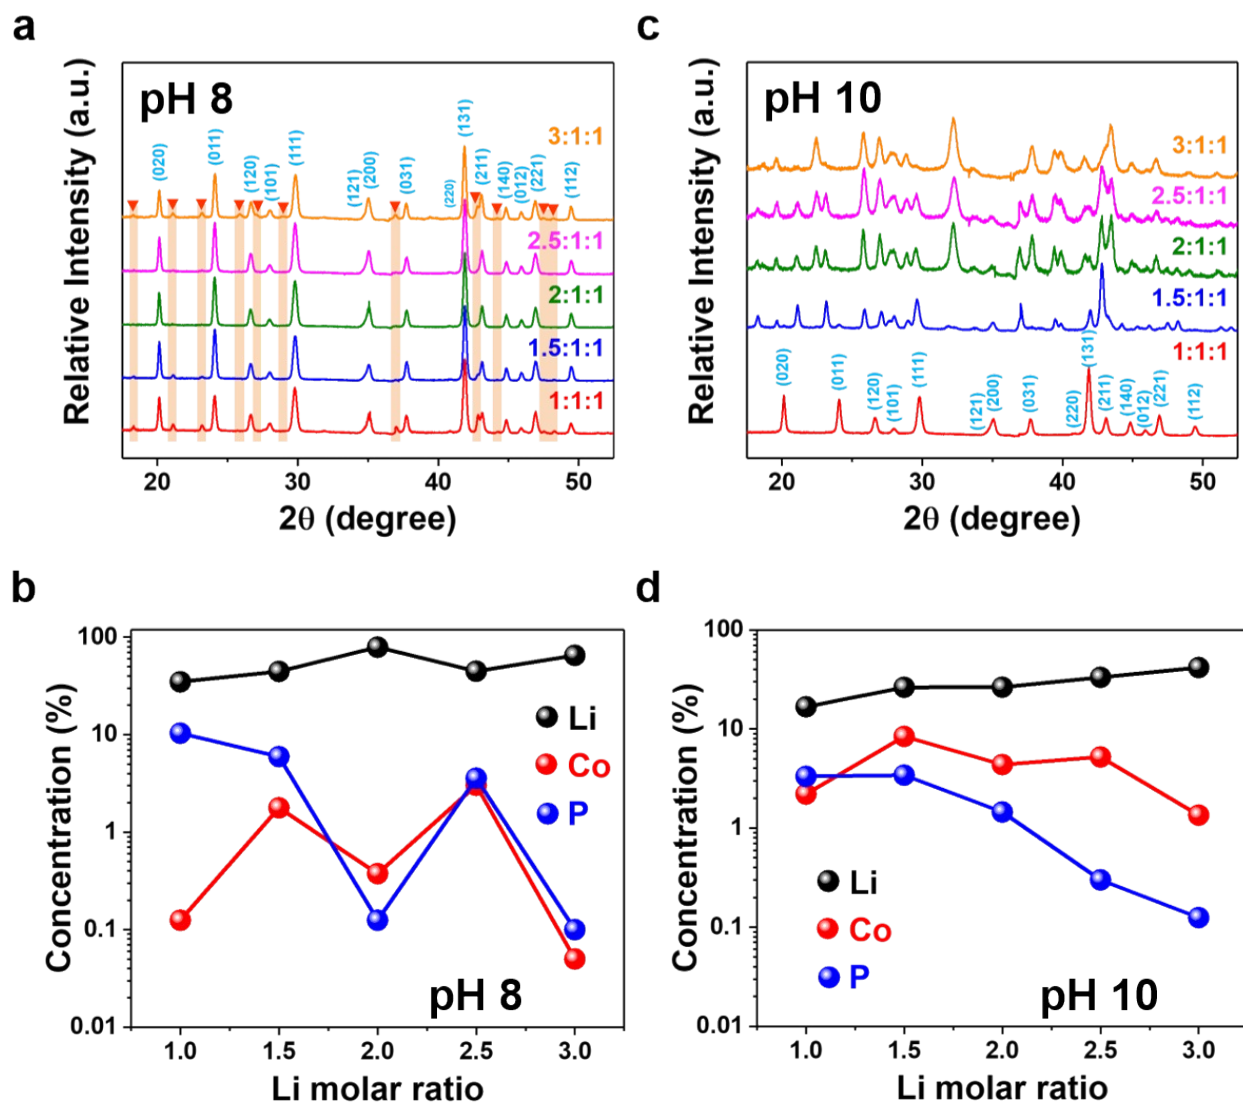

Figure S2. Phase and elemental comparison of HT-LCP samples from the precursor solutions with different Li/Co/P molar ratio at (a-b) pH 8 and (c-d) 10 (The concentration of  $\text{CoSO}_4$  and  $\text{H}_3\text{PO}_4$  is fixed at 0.4 M).

**Table S1. pH value variations before and after HT-synthesis.**

| <b>Li/Co/P<br/>Molar ratio</b> | <b>pH 8</b>   |              | <b>pH 9</b>   |              | <b>pH 10</b>  |              |
|--------------------------------|---------------|--------------|---------------|--------------|---------------|--------------|
|                                | <b>Before</b> | <b>After</b> | <b>Before</b> | <b>After</b> | <b>Before</b> | <b>After</b> |
| 1:1:1                          | 8             | 6.1          | 9             | 9.17         | 10            | 10           |
| 1.5:1:1                        | 8             | 5.04         | 9             | 9.1          | 10            | 10.14        |
| 2:1:1                          | 8             | 4.97         | 9             | 9.07         | 10            | 10.16        |
| 2.5:1:1                        | 8             | 6.26         | 9             | 9.38         | 10            | 9.96         |
| 3:1:1                          | 8             | 8.75         | 9             | 9.36         | 10            | 10           |

**(The concentration of CoSO<sub>4</sub> and H<sub>3</sub>PO<sub>4</sub> is fixed at 0.4 M)**

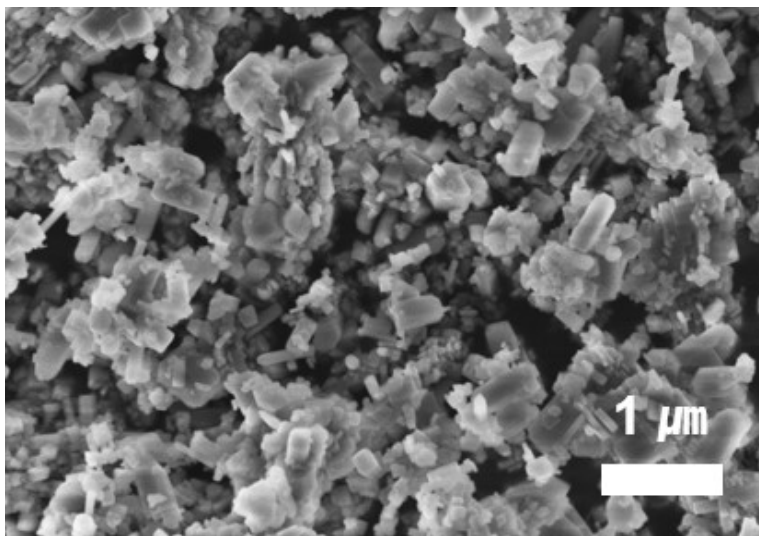

**Figure S3. Morphology of LCP nanocrystals from the precursor solutions with the stoichiometric ratio 1:1:1 (Li:Co:P) at pH 10.**

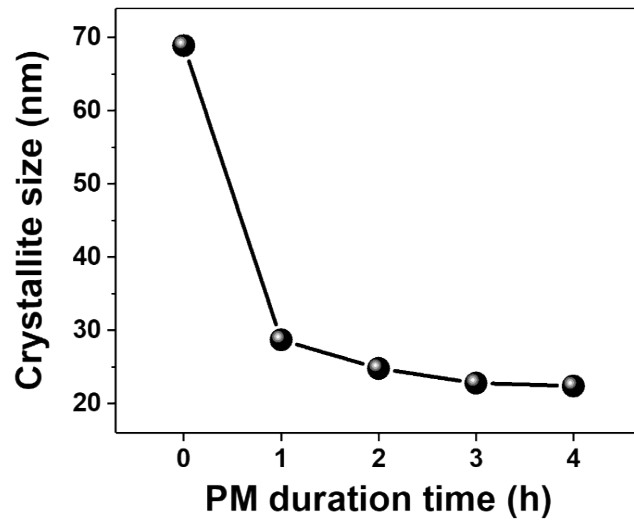

**Figure S4. Crystallite size calculated based on Rietveld refinement with the increasing PM duration time.**

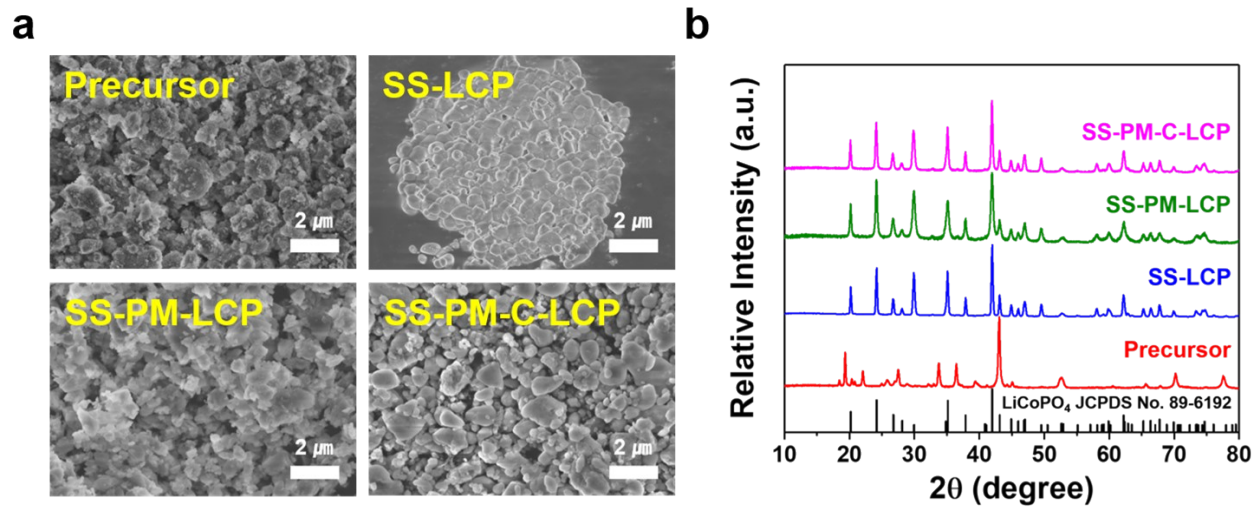

**Figure S5.** Morphology and phase characterizations of LCP samples obtained by solid-state reaction (SS-LCP) and post-synthesis treatments (SS-PM-LCP and SS-PM-C-LCP) via (a) SEM and (b) XRD.

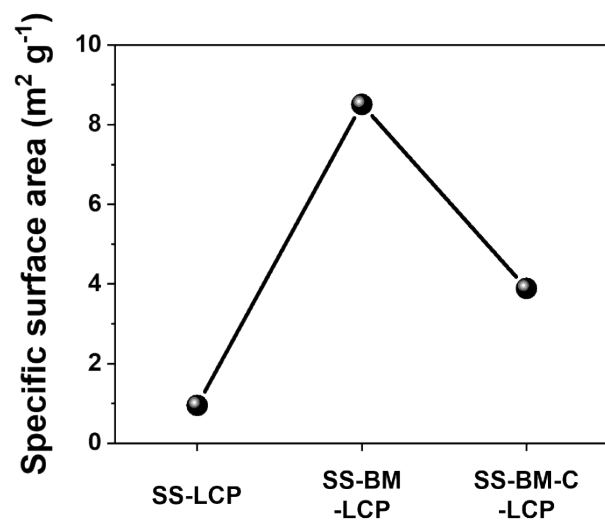

Figure S6. Specific surface area of SS-synthesis samples.



a

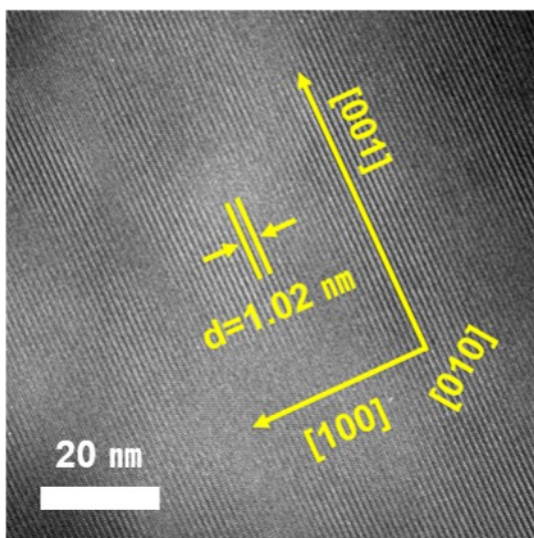

b

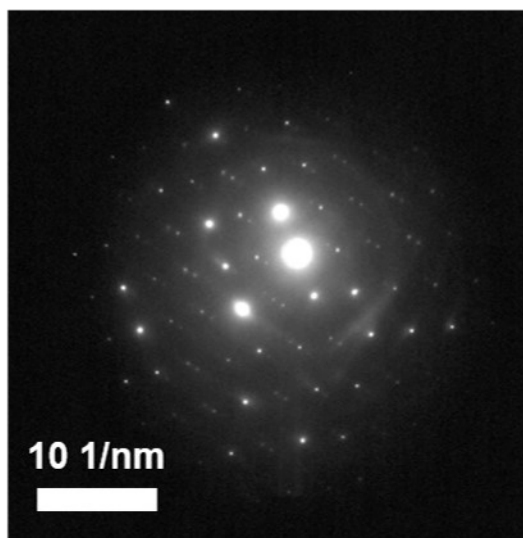

Fig

Figure S7. (a) HRTEM and (b) SAED pattern of HT-LCP.

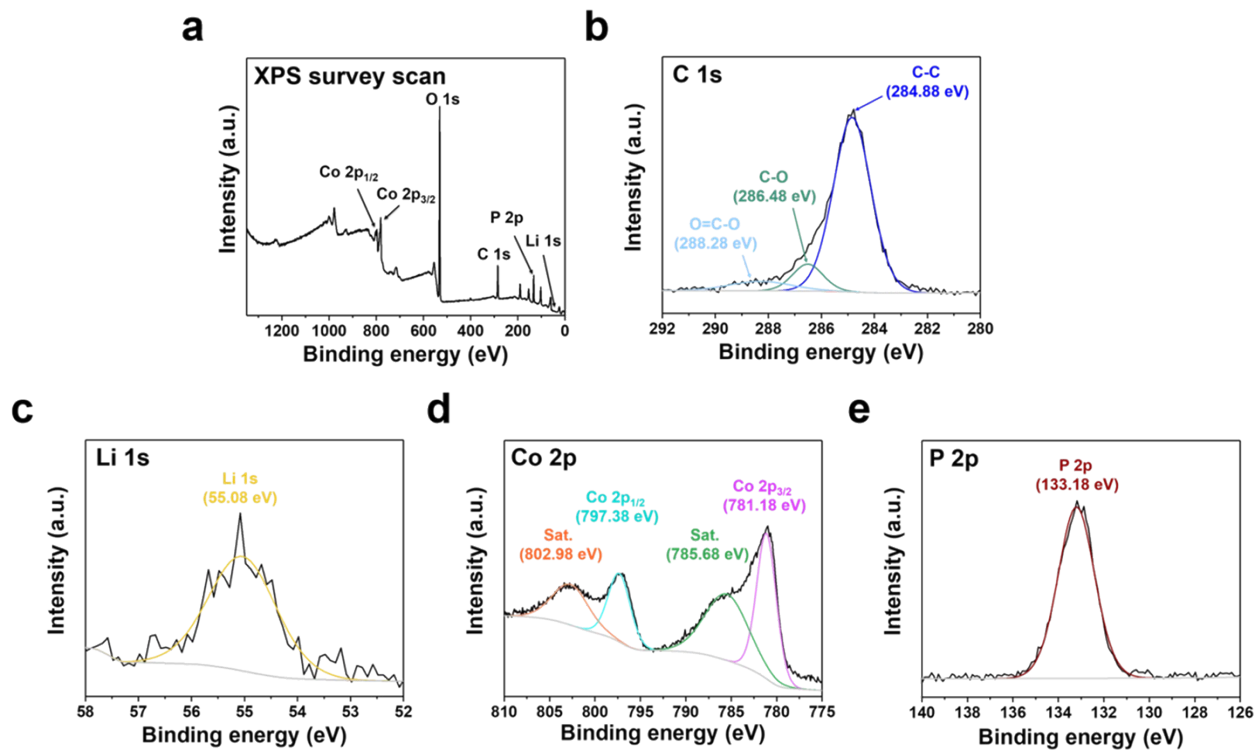

**Figure S8. XPS spectra of HT-LCP: (a) Survey scan, (b) C 1s spectrum, (c) Li 1s spectrum, (d) Co 2p spectrum, and (e) P 2p spectrum.**

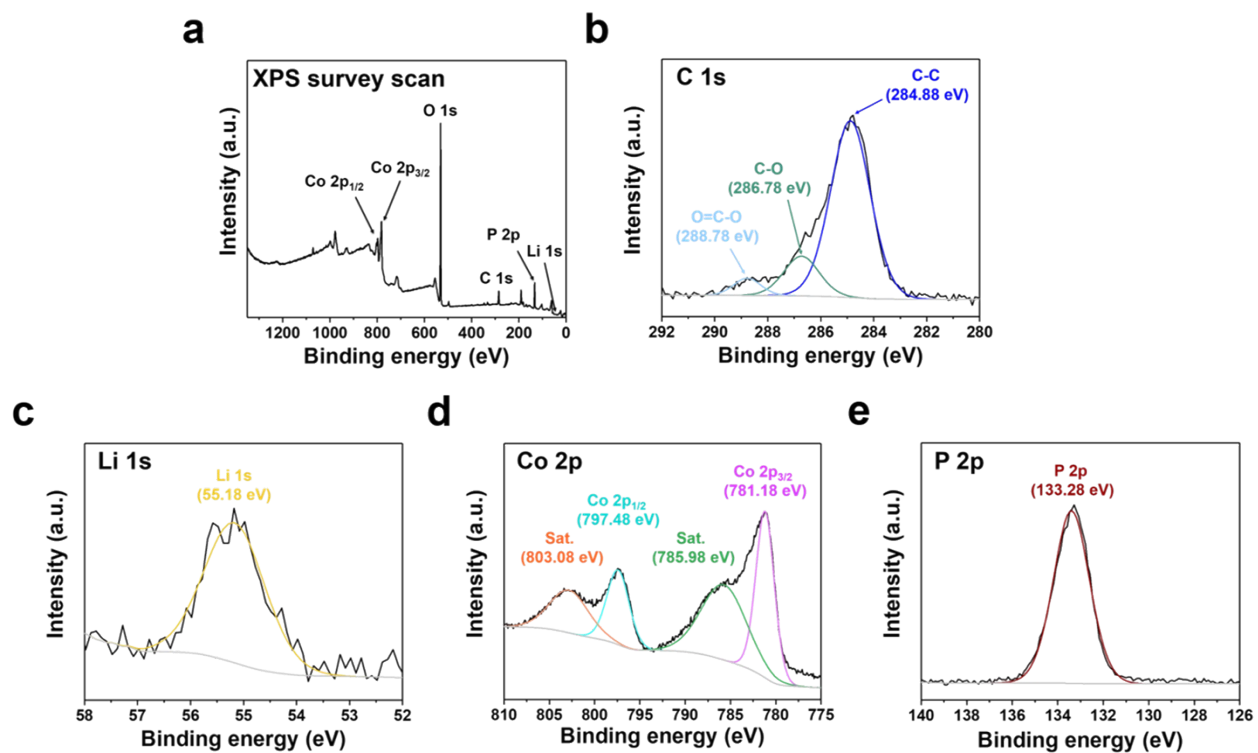

**Figure S9. XPS spectra of SS-LCP: (a) Survey scan, (b) C 1s spectrum, (c) Li 1s spectrum, (d) Co 2p spectrum, and (e) P 2p spectrum.**

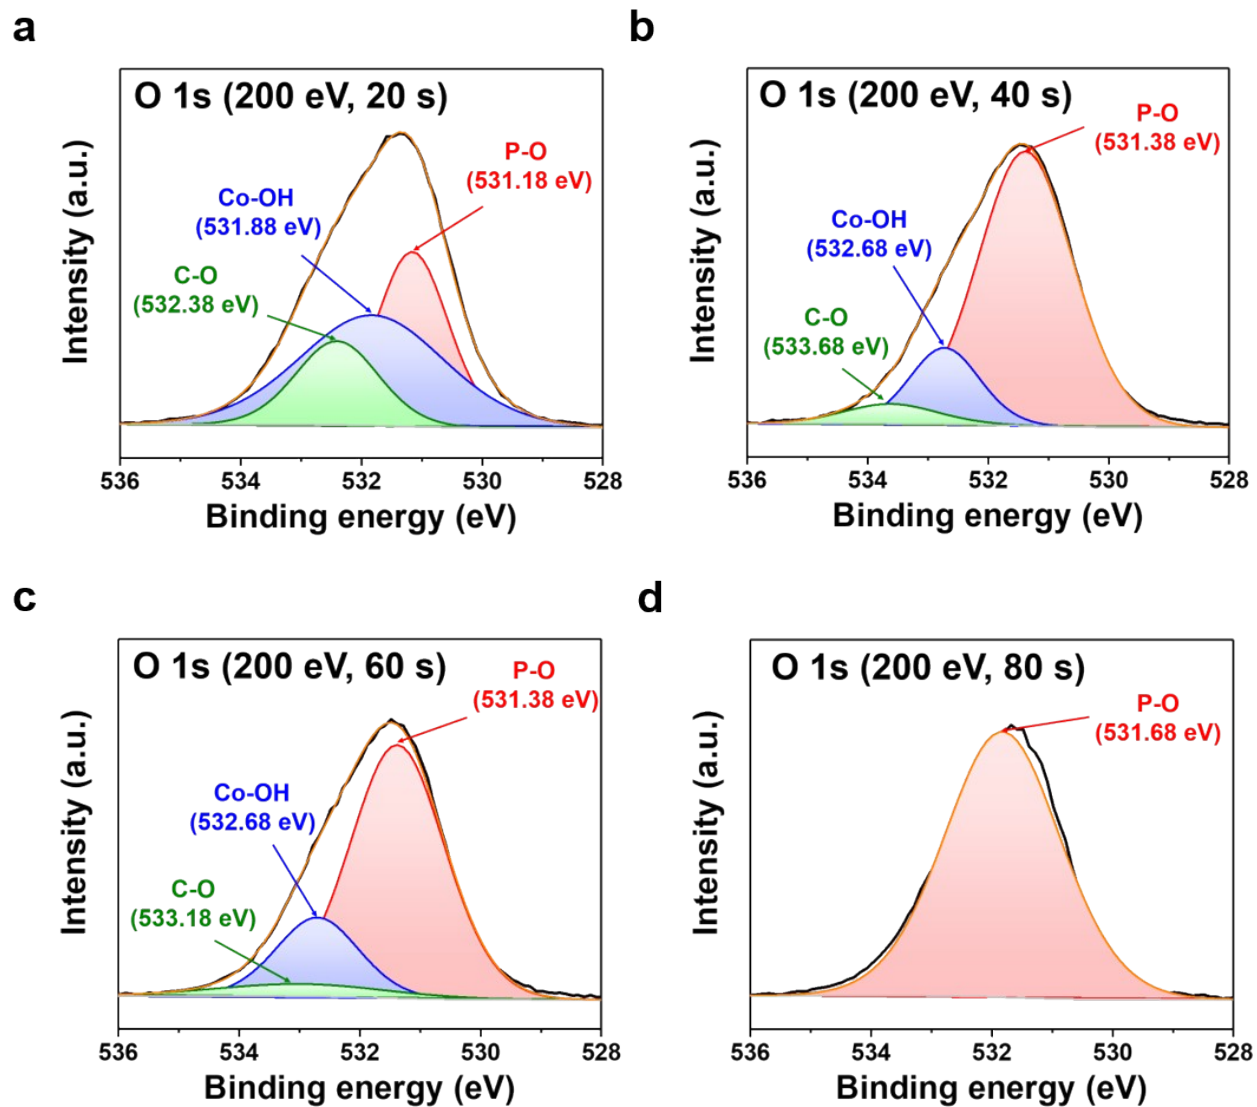

Figure S10. XPS depth profile (O 1s) of HT-LCP with 200 eV laser for (a) 20 seconds, (b) 40 seconds, (c) 60 seconds and (d) 80 seconds.

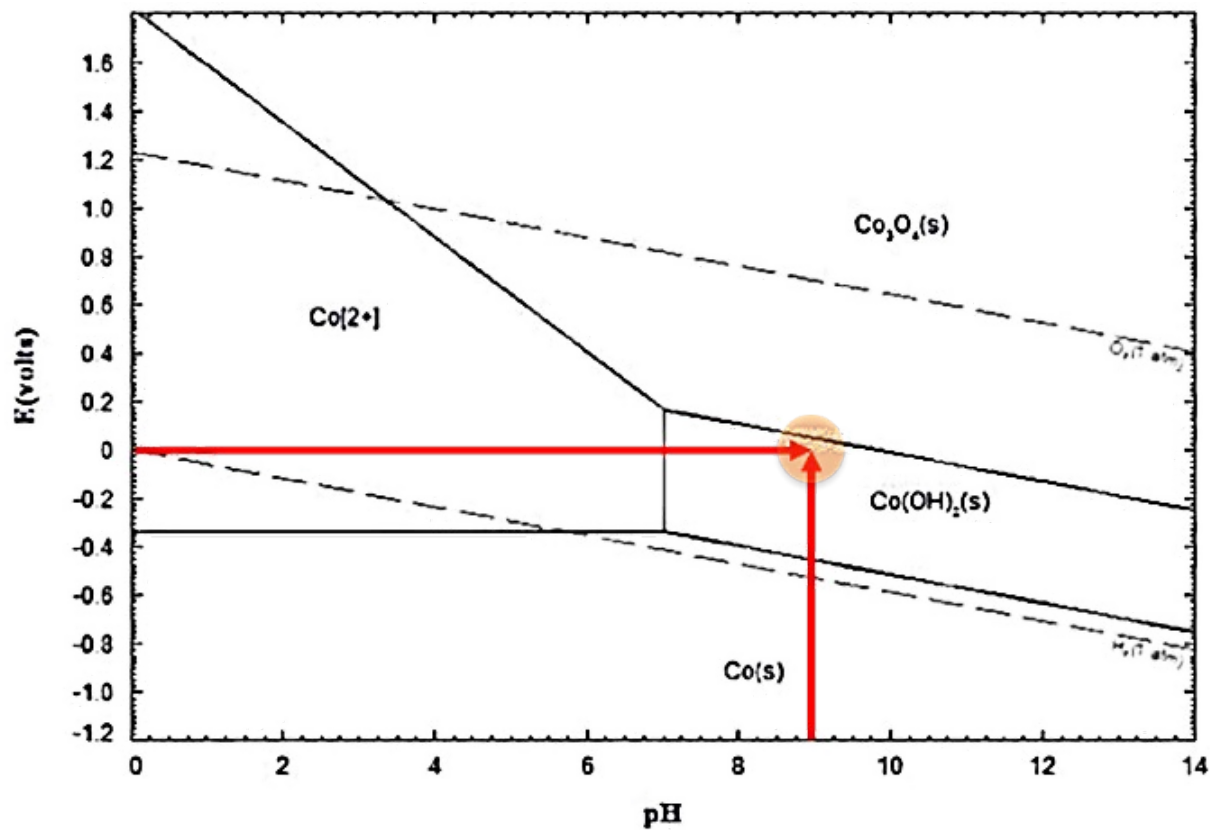

Figure S11. Pourbaix diagram of cobalt (Co-H<sub>2</sub>O at 298.15 K, 0.01 M).<sup>89</sup>

**a**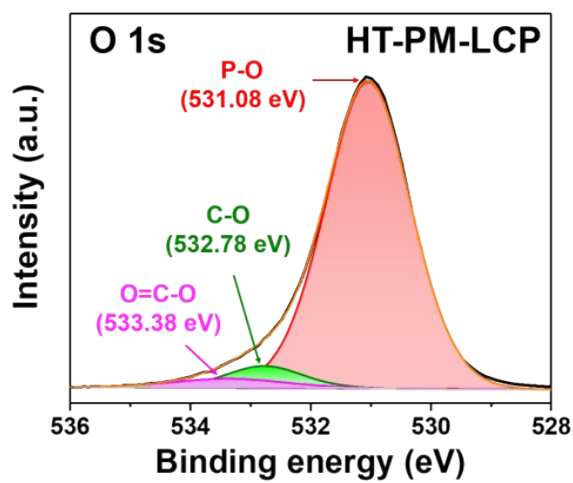**b**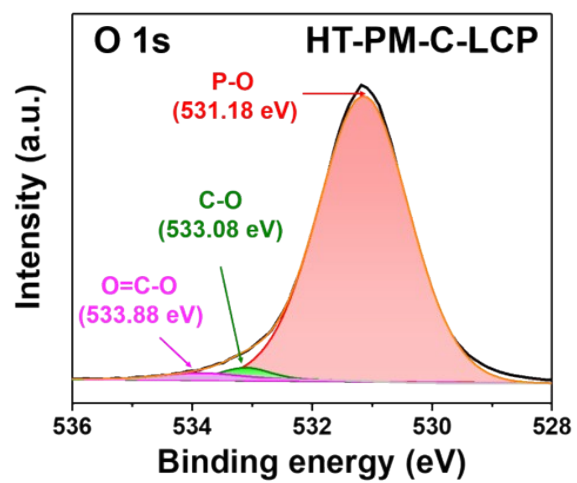

Figure S12. XPS O 1s spectra of (a) HT-PM-LCP, and (b) HT-PM-C-LCP.

**a**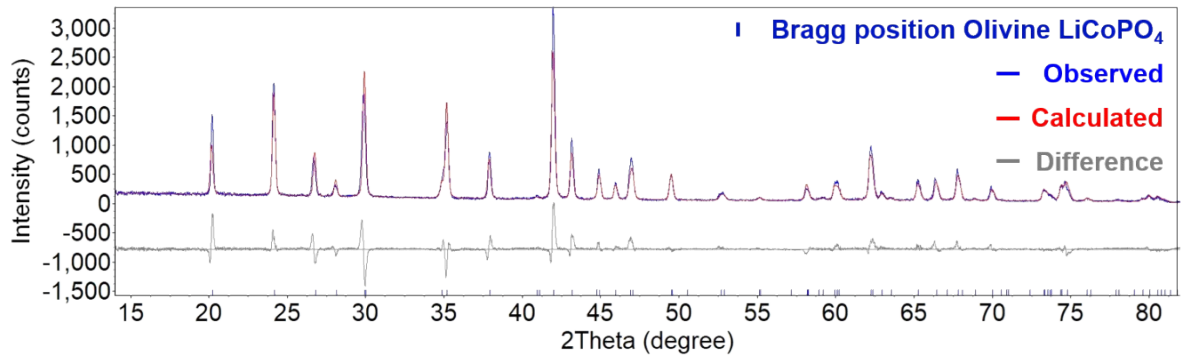**b**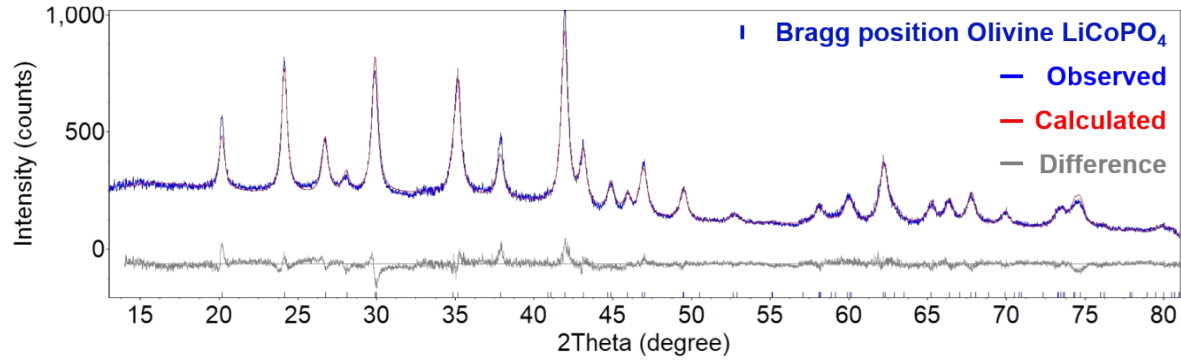**c**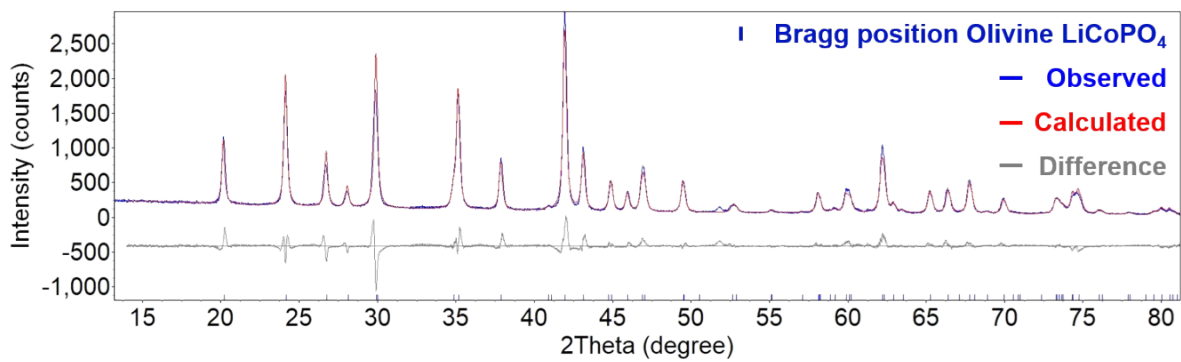

**d**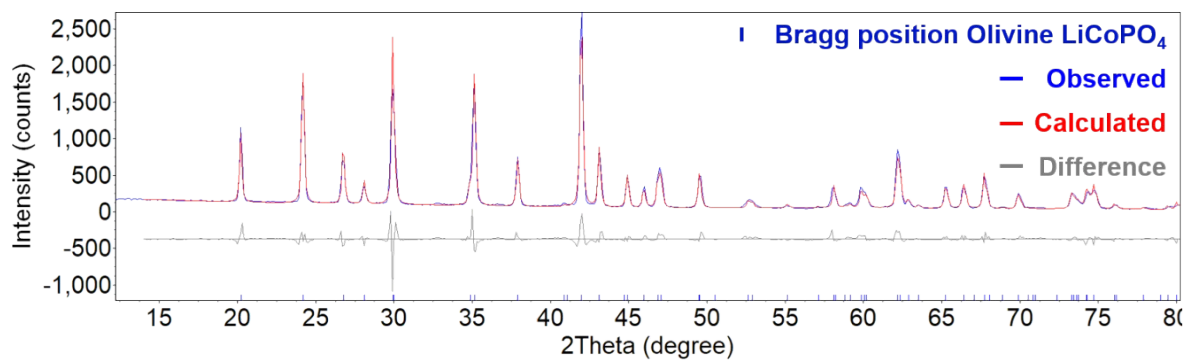**e**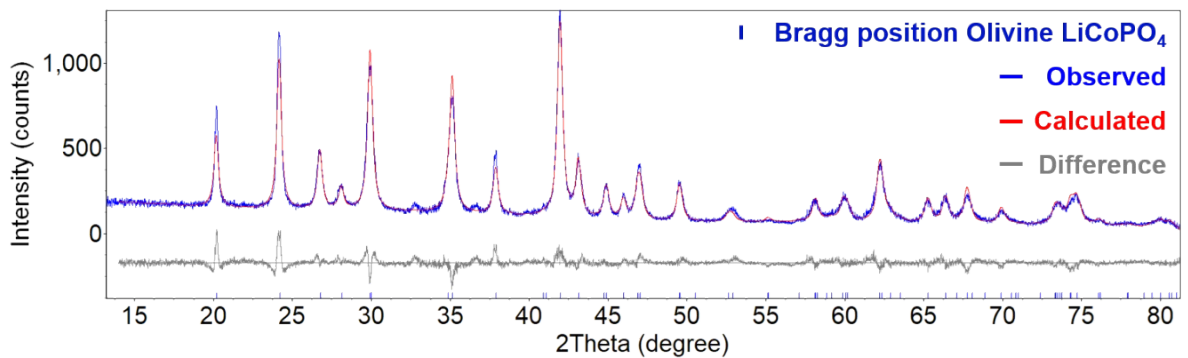**f**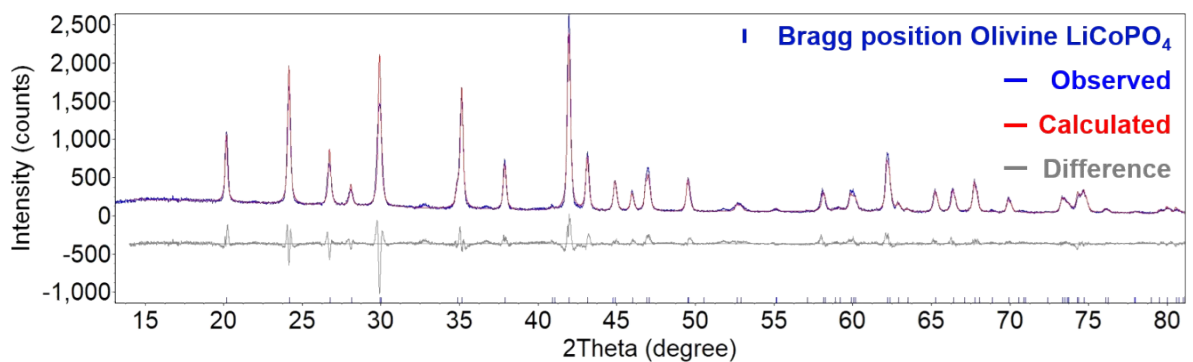

**Figure S13. XRD Rietveld refinement of HT-LCP and SS-LCP samples: (a) HT-LCP, (b) HT-PM-LCP, (c) HT-PM-C-LCP, (d) SS-LCP, (e) SS-PM-LCP, and (f) SS-PM-C-LCP.**
